# Supplementary material for: Colorectal adenocarcinoma with clear cell changes: immunohistological and molecular findings in three cases
Source: PubMed Central journal article supplement (PMC11415476; doi:10.1007/s00428-024-03870-0), 2024-07-23
Supplement: 428_2024_3870_MOESM1_ESM.pdf [file 428_2024_3870_MOESM1_ESM.pdf]

Colorectal adenocarcinoma with clear cell changes. Immunohistological and molecular findings in three cases.  
Virchows Archiv.

Andreas Gocht\*, Carsten Heidel, Jutta Kirfel, Rita Vesce, Pamela Lazar-Karsten, Helen Pasternack, Madelaine Melzer, Phillip Hildebrand, Nicole Warkentin, Hendrik Schimmelpenning, Verena-Wilbeth Sailer

\*Corresponding author: Institut für Pathologie, Universitätsklinikum Schleswig-Holstein, Campus Lübeck, Ratzeburger Allee 160, D-23538 Lübeck, Germany; E-Mail address: Andreas.Gocht@uksh.de

**Supplementary Table 1:** Cases with colorectal and anal carcinomas with clear cell changes reported in the literature and present report (n=73). Epidemiological and pathological findings

| Author (list of references see below) | Age/<br>Gender | Tumor localization                                                 | Metastases                |                                                                       | Enteroblastic markers (AFP/<br>GPC3/SALL4)<br>positive/negative/not done | Mutations in clear cell (CC) and conventional (CV) compartment |
|---------------------------------------|----------------|--------------------------------------------------------------------|---------------------------|-----------------------------------------------------------------------|--------------------------------------------------------------------------|----------------------------------------------------------------|
|                                       |                |                                                                    | Loco-regional lymph nodes | Distant                                                               |                                                                          |                                                                |
| Hellstrom and Fisher 1964             | 67 m           | Rectum                                                             | Yes                       | No                                                                    | N/A                                                                      | N/A                                                            |
| Reed et al. 1983                      | 71 m           | Transverse colon                                                   | N/A                       | N/A                                                                   | N/A                                                                      | N/A                                                            |
| Jewell et al. 1988                    | 75 m           | Rectum                                                             | No                        | No                                                                    | N/A                                                                      | N/A                                                            |
|                                       | 56 f           | Left colon                                                         |                           |                                                                       | N/A                                                                      |                                                                |
| Watson 1990                           | 53 m           | Anal canal                                                         | Yes                       | No                                                                    | N/A                                                                      | N/A                                                            |
| Hitti et al. 1990                     | 39 f           | Sigmoid                                                            | No                        | No                                                                    | N/A                                                                      | N/A                                                            |
| Rubio 1995                            | 68 m           | Left colon                                                         | Yes                       | Liver, lung                                                           | N/A                                                                      | N/A                                                            |
| Sasaki et al. 1996                    | 49 f           | Rectum                                                             | N/A                       | N/A                                                                   | N/A                                                                      | N/A                                                            |
| Young and Hart 1998                   | 33 f           | Transverse colon                                                   | N/A                       | N/A                                                                   | N/A                                                                      | N/A                                                            |
|                                       | 33 f           | Left colon                                                         | N/A                       | N/A                                                                   | N/A                                                                      | N/A                                                            |
|                                       | 49 f           | N/A                                                                | N/A                       | N/A                                                                   | N/A                                                                      | N/A                                                            |
|                                       | 71 f           | N/A                                                                | N/A                       | N/A                                                                   | N/A                                                                      | N/A                                                            |
| Furman and Lauwers 1999               | N/A            | Rectum                                                             | N/A                       | N/A                                                                   | N/A                                                                      | N/A                                                            |
| McCluggage et al. 2001                | 65 f           | Rectum                                                             | Yes                       | Liver, lung, peritoneum, both adrenal glands, para-aortic lymph nodes | N/A                                                                      | N/A                                                            |
| Braumann et al. 2004                  | 89 m           | Left colon                                                         | No                        | No                                                                    | N/A                                                                      | N/A                                                            |
| Mallik and Katchy 2005                | 36 f           | Rectum                                                             | Yes                       | No                                                                    | N/A                                                                      | N/A                                                            |
| Ko et al. 2007                        | 62 m           | Left colon (intramucosal carcinoma)                                | not defined               | not defined                                                           | N/A                                                                      | N/A                                                            |
| Hao et al. 2007                       | 37 m           | Descending colon                                                   | Yes                       | N/A                                                                   | N/A                                                                      | N/A                                                            |
| Sawai 2007                            | 56 f           | Rectum                                                             | N/A                       | N/A                                                                   | N/A                                                                      | N/A                                                            |
| Honma 2007                            | 50 f           | Rectum                                                             | N/A                       | N/A                                                                   | N/A                                                                      | N/A                                                            |
| Barisella et al. 2008                 | 54 m           | Right colon                                                        | No                        | N/A                                                                   | N/A                                                                      | CC: KRAS p.G12V                                                |
| Bressenot et al. 2008                 | 84 f           | Left colon                                                         | No                        | No                                                                    | N/A                                                                      | N/A                                                            |
| Pusztaszeri and Bouzourene 2008       | 62 m           | Sigmoid                                                            | N/A                       | N/A                                                                   | N/A                                                                      | N/A                                                            |
| Soga et al. 2008                      | 71 f           | Right colon (intramucosal carcinoma)                               | not defined               | not defined                                                           | N/A                                                                      | N/A                                                            |
| Eloy et al. 2009                      | 48 f           | Transverse                                                         | not defined               | not defined                                                           | N/A                                                                      | N/A                                                            |
|                                       | 84 m           | Colon (intramucosal carcinoma)<br>Sigmoid (intramucosal carcinoma) | not defined               | not defined                                                           | N/A                                                                      | N/A                                                            |
| Finkelstein et al. 2010               | 41 f           | Rectum                                                             | No                        | No                                                                    |                                                                          | N/A                                                            |

|                                   |                           |                                              |               |                         |                                             |                                                                                                                                                                                                                                                                                                                                                      |
|-----------------------------------|---------------------------|----------------------------------------------|---------------|-------------------------|---------------------------------------------|------------------------------------------------------------------------------------------------------------------------------------------------------------------------------------------------------------------------------------------------------------------------------------------------------------------------------------------------------|
| Shi et al. 2010                   | 52 m                      | Rectum                                       | N/A           | N/A                     | N/A                                         | N/A                                                                                                                                                                                                                                                                                                                                                  |
|                                   | 51 m                      | Sigmoid                                      | N/A           | N/A                     | N/A                                         | N/A                                                                                                                                                                                                                                                                                                                                                  |
|                                   | 61 m                      | Sigmoid<br>(intramucosal carcinoma)          | not defined   | not defined             | N/A                                         | N/A                                                                                                                                                                                                                                                                                                                                                  |
|                                   | 63 m                      | Rectum<br>(intramucosal carcinoma)           | not defined   | not defined             | N/A                                         | N/A                                                                                                                                                                                                                                                                                                                                                  |
|                                   | 35 m                      | Sigmoid<br>(intramucosal carcinoma)          | not defined   | not defined             | N/A                                         | N/A                                                                                                                                                                                                                                                                                                                                                  |
| Furuya et al. 2011                | 81 m                      | Ascending colon                              | Yes           | Liver, lung, peritoneum | AFP+, GPC3N/A, SALL4N/A                     | N/A                                                                                                                                                                                                                                                                                                                                                  |
| Bakshi et al. 2012                | 42 m                      | Transverse colon/hepatic flexure             | No            | N/A                     | N/A                                         | N/A                                                                                                                                                                                                                                                                                                                                                  |
| Kanstrup Fiehn et al. 2012        | 69 m                      | Sigmoid                                      | Yes           | No                      | N/A                                         | CC: <i>KRAS</i> wildtype, MSS                                                                                                                                                                                                                                                                                                                        |
| Kyueng-whan 2013                  | 50 f                      | Rectum                                       | No            | No                      | N/A                                         | N/A                                                                                                                                                                                                                                                                                                                                                  |
| Min et al. 2013                   | 50 f                      | Rectum                                       | No            | No                      | N/A                                         | N/A                                                                                                                                                                                                                                                                                                                                                  |
| Barrera-Maldonado et al. 2014     | 41 f                      | Descending colon                             | Yes           | No                      | N/A                                         | N/A                                                                                                                                                                                                                                                                                                                                                  |
| Gurzu et al. 2014                 | 82 m                      | Rectum                                       | Yes           | Liver                   | N/A                                         | CC: <i>KRAS</i> codon 12 and 13                                                                                                                                                                                                                                                                                                                      |
| Thelin et al. 2014                | 25 m                      | Ascending colon/hepatic flexure              | Yes           | No                      | AFP+, GPC3N/A, SALL4N/A                     | N/A                                                                                                                                                                                                                                                                                                                                                  |
| Wang et al. 2014                  | 26 m                      | Transverse colon/spleen flexure              | N/A           | No                      | N/A                                         | N/A                                                                                                                                                                                                                                                                                                                                                  |
| Mhamdi et al. 2017                | 52 m                      | Sigmoid                                      | Yes           | No                      | N/A                                         | N/A                                                                                                                                                                                                                                                                                                                                                  |
| Remo et al. 2017                  | 58 m                      | Right colon                                  | Yes           | No                      | N/A                                         | CC: <i>BRAF</i> V600E, <i>KRAS</i> wildtype, MSI-H                                                                                                                                                                                                                                                                                                   |
|                                   | 79 m                      | Right colon                                  | No            | No                      | N/A                                         | CC <i>KRAS</i> p.G12V, <i>BRAF</i> wild-type, MSS                                                                                                                                                                                                                                                                                                    |
| Nakamura et al. 2018              | 68 m                      | Rectum                                       | No            | No                      | AFP+, GPC3+, SALL4+                         | N/A                                                                                                                                                                                                                                                                                                                                                  |
| Tochio et al. 2018                | 48 m                      | Descending colon<br>(intramucosal carcinoma) | not defined   | not defined             | AFP-, GPC3-, SALL4-                         | N/A                                                                                                                                                                                                                                                                                                                                                  |
| Oyama et al. 2019                 | 58 m                      | Sigmoid                                      | N/A           | No                      | AFP-, GPC3-, SALL4N/A                       | N/A                                                                                                                                                                                                                                                                                                                                                  |
| Murakami et al. 2020              | 52 f                      | Rectum                                       | No            | Lung                    | AFP+, GPC3+, SALL4+                         | N/A                                                                                                                                                                                                                                                                                                                                                  |
|                                   | 74 m                      | Sigmoid                                      | Yes           | No                      | AFP-, GPC3+, SALL4+                         | N/A                                                                                                                                                                                                                                                                                                                                                  |
|                                   | 59 m                      | Rectum                                       | Yes           | Liver                   | AFP-, GPC3+, SALL4-                         | N/A                                                                                                                                                                                                                                                                                                                                                  |
|                                   | 62 m                      | Sigmoid                                      | Yes           | Liver                   | AFP-, GPC3+, SALL4+                         | N/A                                                                                                                                                                                                                                                                                                                                                  |
|                                   | 84 f                      | Sigmoid                                      | Yes           | No                      | AFP-, GPC3-, SALL4+                         | N/A                                                                                                                                                                                                                                                                                                                                                  |
| Shiratori et al. 2020             | 80 m                      | Transverse colon<br>(intramucosal carcinoma) | not defined   | not defined             | AFP-, GPC3+, SALL4-                         | N/A                                                                                                                                                                                                                                                                                                                                                  |
| Yamashiro et al. 2020<br>10 cases | $\bar{x}$ 66.7 m (6 f (4) | Left colon (7)<br>Right colon (3)            | Yes (6 cases) | N/A                     | all cases with at least one marker positive | 9 cases with <i>TP53</i> (CC and CV not differentiated)<br>p.Pro152Leu c.455C>T and HER2+ (IHC 3 +)<br>p.Val157Phe c.469G>T<br>p.Arg273Cys c.817C>T<br>p.Arg282Trp c.844C>T<br>p.Ile195Thr c.584T>C<br>p.Arg196Ter c.586C>T<br>p.Arg273Cys c.817C>T and p.Ala161Thr c.481G>A<br>p.Tyr163Cys c.488A>G<br>p.Ser241Phe c.722C>T<br>p.Val173Ala c.518T>C |

|                      |      |                  |     |       |                         |                                                                                                                               |
|----------------------|------|------------------|-----|-------|-------------------------|-------------------------------------------------------------------------------------------------------------------------------|
| Tochio et al. 2021   | 57 m | Transverse colon | N/A | N/A   | AFP-, GPC3-, SALL4-     | N/A                                                                                                                           |
| Abada et al. 2022    | 26 f | Sigmoid          | N/A | Liver | AFP+, GPC3N/A, SALL4+   | CC: <i>TP53</i> p.R175H, <i>KRAS</i> mutated (not specified), <i>MUTYH</i> p.G396D (exon 13), <i>KDM6A</i> p.S532fs (exon 16) |
| Giuseppe et al. 2022 | 71 m | Sigmoid          | Yes | Liver | AFP+, GPC3+, SALL4+     | CC: <i>KRAS</i> , <i>NRAS</i> , <i>BRAF</i> wildtype, MSS, HER2 overexpression (immunohistologically)                         |
| Karačić et al. 2022  | 65 m | Sigmoid          | Yes | N/A   | AFP-, GPC3N/A, SALL4N/A | N/A                                                                                                                           |
| Khefacha et al. 2022 | 75 f | Right Colon      | No  | No    | N/A                     | N/A                                                                                                                           |
| Kihara et al. 2022   | 53 m | Rectum           | Yes | No    | AFP-, GPC3+, SALL4+     | N/A                                                                                                                           |
| Li et al. 2023       | 65 m | Transverse colon | N/A | N/A   | AFP+, GPC3N/A, SALL4N/A | N/A                                                                                                                           |
| Present study        | 70 m | Rectum           | No  | No    | AFP+, GPC3+, SALL4-     | CC and CV: <i>TP53</i> p.L265P, MSS                                                                                           |
|                      | 69 m | Rectum           | Yes | Liver | AFP-, GPC3+, SALL4-     | CC and CV: <i>TP53</i> p.R158H, <i>TP53</i> p.R273H, MSS                                                                      |
|                      | 75 m | Ascending colon  | No  | No    | AFP-, GPC3-, SALL4-     | CC: <i>TP53</i> p.V173L, <i>SMAD4</i> p.F339L, MSS<br>CV: <i>TP53</i> p.V173L, <i>ATM</i> p.V849A, MSS                        |

**Abbreviations:** m male; f female; N/A not available; GPC3 glypican-3

#### References:

- Hellstrom HR, Fisher ER (1964) Physaliferous variant of carcinoma of colon. *Cancer* 17:259-263. [https://doi.org/10.1002/1097-0142\(196402\)17:2<259::aid-cnrcr2820170217>3.0.co;2-s](https://doi.org/10.1002/1097-0142(196402)17:2<259::aid-cnrcr2820170217>3.0.co;2-s)
- Reed RJ, Love GL, Harkin JC (1983) Consultation case. *Am J Surg Pathol* 7(6):597-601
- Jewell LD, Barr JR, McCaughey WT, Nguyen GK, Owen DA (1988) Clear-cell epithelial neoplasms of the large intestine. *Arch Pathol Lab Med* 112(2):197-199
- Watson PH (1990) Clear-cell carcinoma of the anal canal: a variant of anal transitional zone carcinoma. *Hum Pathol* 21(3):350-352. doi:10.1016/0046-8177(90)90237-y
- Hitti IF, Glasberg SS, Lubicz S (1990) Clear cell carcinoma arising in extraovarian endometriosis: report of three cases and review of the literature. *Gynecol Oncol* 39(3):314-320. doi:10.1016/0090-8258(90)90259-n
- Rubio CA (1995) Clear cell adenocarcinoma of the colon. *J Clin Pathol* (12):1142-1144. doi:10.1136/jcp.48.12.1142
- Sasaki M, Miyoshi N, Hirata T, Maruyama H, Nakai H, Sasaki N, et al. (1996) A case of malignant mixed epithelial tumor arising from endometriosis of the rectovaginal septum. *J Jpn Pract Surg Soc* 57(9): 2268-72
- Young RH, Hart WR (1998) Metastatic intestinal carcinomas simulating primary ovarian clear cell carcinoma and secretory endometrioid carcinoma: a clinicopathologic and immunohistochemical study of five cases. *Am J Surg Pathol* 22(7):805-815. doi:10.1097/00000478-199807000-00003
- Furman J, Lauwers GY (1999) Clear cell change in colonic adenocarcinoma: an equally unusual finding [published correction appears in *Histopathology* 2000 Feb;36(2):191]. *Histopathology* 35(5):476-477. doi:10.1046/j.1365-2559.1999.035005476.x
- McCluggage WG, Desai V, Toner PG, Calvert CH (2001) Clear cell adenocarcinoma of the colon arising in endometriosis: a rare variant of primary colonic adenocarcinoma. *J Clin Pathol* 54(1):76-77. doi:10.1136/jcp.54.1.76
- Braumann C, Schwabe M, Ordemann J, Jacobi CA (2004) The clear cell adenocarcinoma of the colon: case report and review of the literature. *Int J Colorectal Dis* 19(3):264-267. doi:10.1007/s00384-003-0545-5
- Mallik AA, Katchy KC (2005) Clear cell adenocarcinoma of the rectum. *Med Princ Pract* 14(1):58-60. doi:10.1159/000081926

13. Ko YT, Baik SH, Kim SH, Min BS, Kim NK, Cho CH, Lee S K, Kim HG (2007) Clear cell adenocarcinoma of the sigmoid colon. *Int J Colorectal Dis* 22(12):1543-1544. doi:10.1007/s00384-006-0257-8
14. Hao LS, Zhu X, Zhao LH, Qian K, Zhou Y, Bu J, Wu XT (2007) Clear cell adenocarcinoma of colorectum: a case report and review of the literature. *Acta Gastroenterol Belg* 70(2):235-238
15. Sawai K (2008) Endometrioid adenocarcinoma arising from endometriosis of the rectum. *J Jpn Surg Assoc* 69(8): 2063–7. <https://doi.org/10.3919/jjsa.69.2063>.
16. Honma S (2009) A case of clear cell adenocarcinoma arising in the endometriosis of the rectum. *J Jpn Soc Coloproctol* 62:416–419
17. Barisella M, Lampis A, Perrone F, Carbone A (2008) Clear cell adenocarcinoma of the colon is a unique morphological variant of intestinal carcinoma: case report with molecular analysis. *World J Gastroenterol* 14(42):6575-6577. <https://doi.org/10.3748/wjg.14.6575>
18. Bressenot A, Marcon N, Montagne K, Pléat F(2008) Clear cell adenocarcinoma: a rare variant of primary colonic tumour. *Int J Colorectal Dis* 23(1): 137–138
19. Pusztaszeri M, Bouzourene H (2008) Invasive carcinoma arising from a colonic adenoma with clear cell change. *Hum Pathol* 39(9):1402–1405. <https://doi.org/10.1016/j.humpath.2008.01.008>
20. Soga K, Konishi H, Tatsumi N, Konishi C, Nakano K, Wakabayashi N, Mitsufuji S, Kataoka K, Okanoue T, Mukaiho K, Hattori T (2008) Clear cell adenocarcinoma of the colon: a case report and review of literature. *World J Gastroenterol* 14(7):1137-1140. doi:10.3748/wjg.14.1137
21. Eloy C, Lopes JM, Faria G, Moreira H, Brandão A, Silva T, Carneiro F (2009) Clear cell change in colonic polyps. *Int J Surg Pathol* 17(6):438-443. <https://doi.org/10.1177/1066896908319211>
22. Finkelstein A, Levy GH, Hui P (2010) Clear cell adenocarcinoma of the colon arising in the background of endometriosis: a case report and diagnostic approach. *Lab Med* 41(2): 111–114
23. Shi C, Scudiere JR, Cornish TC, Lam-Himlin D, Park JY, Fox MR, Montgomery EA (2010) Clear cell change in colonic tubular adenoma and corresponding colonic clear cell adenocarcinoma is associated with an altered mucin core protein profile. *Am J Surg Pathol* 34(9):1344-50. <https://doi.org/10.1097/PAS.0b013e3181ec0810>.
24. Furuya Y, Wakahara T, Akimoto H, Kishimoto T, Hiroshima K, Yanagie H, Yasuhara H (2011) Clear cell adenocarcinoma with enteroblastic differentiation of the ascending colon. *J Clin Oncol* 29(22):e647-9. <https://doi.org/10.1200/JCO.2011.34.9670>
25. Bakshi N, Sharma S, Kaushal V, Mardi K (2012) Clear cell adenocarcinoma of the colon is a unique morphologic variant of intestinal carcinoma: a rare case report. *Clin Cancer Investig J* 1(3):173–175
26. Kanstrup Fiehn AM, Andersson S, Grupe Larsen L (2012) Primært clear-celle-adenokarcinom i colon [Primary clear cell adenocarcinoma of the colon]. *Ugeskrift for læger* 174(39):2307–2308
27. Kyueng-whan M, Koh YW, Ryu YJ, Hong SM, Kim KR, Sung CO (2013) Primary clear cell adenocarcinoma arising from rectal endometriosis. *Dig Endosc* 25: 204–215
28. Min K-W, Koh YW, Ryu Y-J (2013) Primary clear cell adenocarcinoma arising from rectal endometriosis. *Dig Endosc* 25(2): 209–10. <https://doi.org/10.1111/den.12008>
29. Barrera-Maldonado CD, Wiener I, Sim S (2014) Clear cell adenocarcinoma of the colon: a case report and review of the literature. *Case Rep Oncol Med* 2014:905478. <https://doi.org/10.1155/2014/905478>
30. Gurzu S, Jung I, Bara T, Bara T Jr, Serester O (2014) Immunohistochemical and molecular features of primary clear cell adenocarcinoma of the rectum, as predictive factors for individualized therapy. *Rom J Morphol Embryol* 55(2 Suppl):629-633. PMID: 25178336
31. Okazawa Y, Takahashi R, Mizukoshi K, Takehara K, Ishiyama S, Sugimoto K, Takahashi M, Kojima Y, Goto M, Okuzawa A, Tomiki Y, Yao T, Sakamoto K (2014) A case of clear cell adenocarcinoma arising from endometriosis of the rectum treated by laparoscopic surgery. *Int J Surg Case Rep* 5(12):979-983. doi:10.1016/j.ijscr.2014.10.034

32. Thelin C, Alquist CR, Engel LS, Dewenter T (2014) Primary clear cell adenocarcinoma of the colon: a case report and review. *J La State Med Soc* 166(4): 143–148
33. Wang W, Li X, Qu G, Leng T, Geng J (2014) Primary clear cell adenocarcinoma of the colon presenting as a huge extracolonic mass: a case report. *Oncol Lett* 8(4): 1873–1875
34. Mhamdi N, Bdioui A, Abdessayed N, Mestiri S, Guerfela, M, Mokni M (2017) Clear cell adenocarcinoma of the colon in the setting of attenuated familial polyposis: a rare variant of primary colonic adenocarcinoma. *Next Generat Sequenc Applic* 4(1): 1000143. <https://doi.org/10.4172/2469-9853.1000143>
35. Remo A, Grillo F, Mastracci L, Fassan M, Sina S, Zanella C, Parcesepe P, Damiano Urso E, Pancione M, Bortuzzo G, Scarpa A, Manfrin E (2017) Clear cell colorectal carcinoma: Time to clarify diagnosis. *Pathol Res Pract* 213(5):447-452. doi:10.1016/j.prp.2017.02.013
36. Nakamura Y, Matsuda K, Yokoyama S, Tamura K, Mitani Y, Iwamoto H, Mizumoto Y, Murakami D, Fujimoto M, Yamaue H (2018) Alpha-fetoprotein-producing rectal cancer successfully responded to preoperative chemoradiotherapy: case report. *Surg Case Rep* 4(1):111. <https://doi.org/10.1186/s40792-018-0520-6>
37. Tochio T, Mukai K, Baba Y, Asakawa H, Nose K, Tsuruga S, Kumazawa H, Isono Y, Tanaka H, Matsusaki S, Sase T, Saito T, Okano H, Usui M, Watanabe G (2018) Early stage clear cell adenocarcinoma of the colon examined in detail with image-enhanced endoscopy: a case report. *Clin J Gastroenterol* 11(6):465-469. doi:10.1007/s12328-018-0889-6
38. Oyama Y, Nishida H, Kusaba T, Kadowaki H, Arakane M, Okamoto K, Wada J, Urabe S, Daa T (2019) Colon adenoma and adenocarcinoma with clear cell components - two case reports. *Diagn Pathol* 14(1):37. <https://doi.org/10.1186/s13000-019-0819-z>
39. Murakami T, Yao T, Yatagai N, Yamashiro Y, Saito T, Sakamoto N, Nagahara A (2020) Colorectal adenocarcinoma with enteroblastic differentiation: a clinicopathological study of five cases. *Histopathology* 76(2):325-332. <https://doi.org/10.1111/his.13973>
40. Shiratori Y, Suzuki K, Ikeya T (2020) Colonic clear cell adenocarcinoma with enteroblastic differentiation. *Clin J Gastroenterol* 13(6):1196-1199. <https://doi.org/10.1007/s12328-020-01209-1>
41. Tochio T, Baba Y, Asakawa H, Nose K, Tsuruga S, Kumazawa H, Isono Y, Tanaka H, Matsusaki S, Sase T, Saito T, Okano H, Mukai K, Kushima R (2021) Early stage clear cell adenocarcinoma coexisting with tubular adenoma and adenoma with clear cell change in the colon. *Clin J Gastroenterol* 14(2):589-593. <https://doi.org/10.1007/s12328-020-01334-x>
42. Abada E, Anaya IC, Abada O, Lebbos A, Beydoun R (2022) Colorectal adenocarcinoma with enteroblastic differentiation: diagnostic challenges of a rare case encountered in clinical practice. *J Pathol Transl Med* 56(2):97-102. <https://doi.org/10.4132/jptm.2021.10.28>
43. Giuseppe L, Giovanna S, Massimo M (2022) Novel recognition of HER2 amplification in enteroblastic colonic adenocarcinoma. Diagnostic clues and future perspectives. *J Surg Res* 5(3): 559–562. <https://doi.org/10.26502/jsr.10020256>
44. Karačić A, Stanić G, Štritof D, Bakula B, Jandrić D, Kekez I (2022) Mucinous adenocarcinoma of the colon with clear cell component: a case report and literature review. *Case Rep Pathol* 2022:7631686. <https://doi.org/10.1155/2022/7631686>
45. Khefacha F, Triki W, Ayed K, Abbassi I, Baccar A, Baraket O, Bouchoucha S (2022) Right colon clear cell carcinoma of Müllerian type. *Case Rep Gastroenterol* 16(2):469-479. <https://doi.org/10.1159/000525071>
46. Kihara T, Kuwahara R, Kusunoki K, Minagawa T, Horio Y, Uchino M, Ikeuchi H, Hirota S (2022) Rectal carcinoma with dual differentiation toward enteroblastic and neuroendocrine features arising in a patient with ulcerative colitis: a case report. *World J Surg Oncol* 20(1):371. <https://doi.org/10.1186/s12957-022-02838-1>
47. Kurosawa T, Murakami T, Yamashiro Y, Terukina H, Hayashi T, Saito T, Nojiri S, Sakamoto K, Nagahara A, Yao T (2022) Mucin phenotypes and clinicopathological features of colorectal adenocarcinomas: Correlation with colorectal adenocarcinoma with enteroblastic differentiation. *Pathol Res Pract* 232:153840. <https://doi.org/10.1016/j.prp.2022.153840>
48. Li F, Chen D, Chen J, Nie L (2023) Colonic de novo clear cell adenocarcinoma of intestinal-type: a case report and review of the literature. *Int J Surg Pathol* 10668969231214808. <https://doi.org/10.1177/10668969231214808>
