# Supplementary material for: Colorectal adenocarcinoma with clear cell changes: immunohistological and molecular findings in three cases
Source: PubMed Central journal article supplement (PMC11415476; doi:10.1007/s00428-024-03870-0), 2024-07-23
Supplement: 428_2024_3870_MOESM2_ESM.pdf [file 428_2024_3870_MOESM2_ESM.pdf]

Colorectal adenocarcinoma with clear cell changes. Immunohistological and molecular findings in three cases. Virchows Archiv.

Andreas Gocht\*, Carsten Heidel, Jutta Kirfel, Rita Vesce, Pamela Lazar-Karsten, Helen Pasternack, Madelaine Melzer, Phillip Hildebrand, Nicole Warkentin, Hendrik Schimmelpenning, Verena-Wilbeth Sailer

\*Corresponding author: Institut für Pathologie, Universitätsklinikum Schleswig-Holstein, Campus Lübeck, Ratzeburger Allee 160, D-23538 Lübeck, Germany; E-Mail address: Andreas.Gocht@uksh.de

**Supplementary Table 2: Immunohistochemistry and molecular analysis.**

**Antibody specification and manufacturer used for immunohistochemistry**

| Antigen <sup>a</sup> | Clone      | Manufacturer  | Pretreatment (minutes)               |
|----------------------|------------|---------------|--------------------------------------|
| CK20                 | SP33       | Ventana/Roche | CC1 (64 min.)                        |
| CDX2                 | EPR2764Y   | Cell Marque   | CC1 (32 min.)                        |
| SATB2                | EP281      | Cell Marque   | CC1 (32 min.)                        |
| CEA                  | CEA31      | Cell Marque   | Protease1 (min.)                     |
| CK7                  | SP52       | Ventana/Roche | CC1 (24 min.)                        |
| CAIX                 | EP161      | Cell Marque   | CC1 (32 min.) and Protease3 (4 min.) |
| PAX8                 | MRQ-50     | Cell Marque   | CC1 (64 min.)                        |
| RCC                  | PN-15      | Cell Marque   | Protease1 (4 min.)                   |
| AFP                  | Polyclonal | Cell Marque   | CC1 24 (min.)                        |
| GPC3                 | GC33       | Ventana/Roche | CC1 (24 min.)                        |
| SALL4                | 6E3        | Cell Marque   | CC1 (32 min.)                        |
| Vimentin             | V9         | Ventana/Roche | CC1 (8 min.)                         |
| CD10                 | SP67       | Ventana/Roche | CC1 (64 min.) and amplifier          |
| p53                  | DO-7       | Ventana/Roche | CC1 (48 min.)                        |
| Chromogranin A       | LK2H10     | Ventana/Roche | CC1 (8 min.)                         |
| Synaptophysin        | SP11       | Ventana/Roche | CC1 (40 min.)                        |
| CD56                 | MRQ-42     | Cell Marque   | CC1 (40 min.)                        |
| MLH1*                | M1         | Ventana/Roche | CC1 (48 min.) and amplifier          |
| PMS2*                | EPR3947    | Cell Marque   | CC1 (72 min.) and amplifier          |
| MSH2*                | G219-1129  | Cell Marque   | CC1 (64 min.)                        |
| MSH6*                | 44         | Cell Marque   | CC1 (72 min.) and amplifier          |
| MUC1                 | DCM-17     | DCS           | CC1 (20 min.)                        |
| MUC2                 | CCP58      | Agilent       | CC1 (40 min.)                        |
| MUC5AC               | CLH2       | Chemicon      | CC1 (40 min.)                        |
| MUC6                 | DCM-20     | DCS           | CC1 (40 min.)                        |

<sup>a</sup>CAIX = Carboanhydrase IX; RCC = Renal cell carcinoma marker; GPC3 = glypican-3; MMR = mismatch repair proteins

**Molecular Analysis:** To identify genetic alterations, the Ion AmpliSeq™ Colon and Lung Cancer Research Panel v2, the Ion AmpliSeq™ Cancer Hotspot Panel v2, and the Ion GeneStudio™ S5 Systems (all from ThermoFisher Scientific, Carlsbad, CA, U.S.A.) were used. These panels are designed to cover approximately 2,800 COSMIC mutations of oncogenes and tumor suppressor genes. These include *ABL1*, *AKT1*, *ALK*, *APC*, *ATM*, *BRAF*, *CDH1*, *CDKN2A*, *CSF1R*, *CTNNB1*, *DDR2*, *EGFR*, *ERBB2*, *ERBB4*, *EZH2*, *FBXW7*, *FGFR1*, *FGFR2*, *FGFR3*, *FLT3*, *GNA11*, *GNAQ*, *GNAS*, *HNF1A*, *HRAS*, *IDH1*, *IDH2*, *JAK2*, *JAK3*, *KDR*, *KIT*, *KRAS*, *MET*, *MLH1*, *MPL*, *NOTCH1*, *NPM1*, *NRAS*, *PDGFRA*, *PIK3CA*, *PTEN*, *PTPN11*, *RBI*, *RET*, *SMAD4*, *SMARCB1*, *SMO*, *SRC*, *STK11*, *TP53*, *VHL*.
